# Supplementary material
Source: Springer Nature journal article supplement (https://www.springermedizin.de/resource/supplementary/12911_2009_892_MOESM6_ESM.pdf/9527560)

■ Physicians

□ Nurses

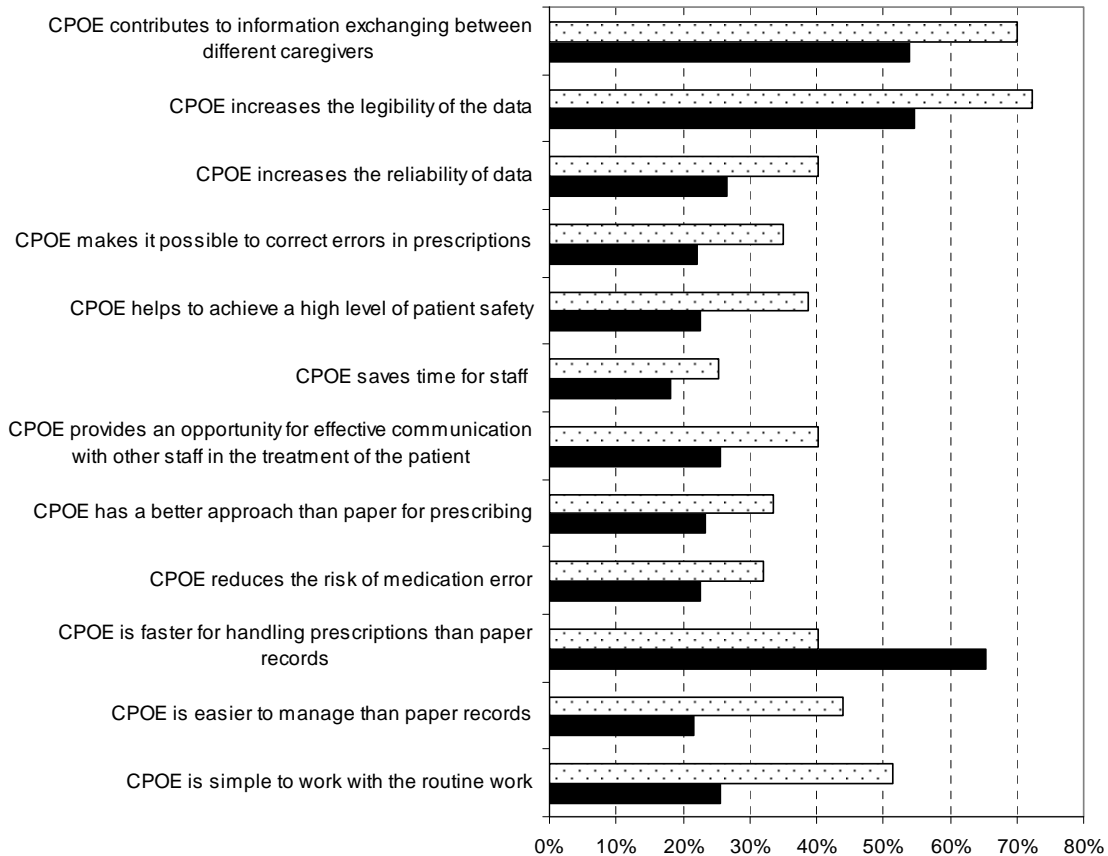

Supplement: MOESM6 [file 9527560]
